# Supplementary material for: Population structure and fecundity of the Xanthid crab Leptodius exaratus (H. Milne Edwards, 1834) on the rocky shore of Gujarat state, India
Source: PeerJ. 2024 Feb 13;12:e16916. doi: 10.7717/peerj.16916 (PMC10870924; doi:10.7717/peerj.16916)
Supplement: Supplemental Information 1 [file peerj-12-16916-s001.xlsx]

## Sheet: Main Data
Month	Carapace width	Carapace length	Male/Non-Ovigerous Female/Ovigerous Female		Months	Average Ambient Temperature (Celcius)
August	15.97	10.78	Male		January	22.3
August	14.13	9.54	Male		February	23.8
August	23.03	15.13	Male		March	28.5
August	19.49	12.55	Male		April	29.3
August	19.92	13.38	Male		May	32.5
August	25.65	16.83	Male		June	30
August	16.02	10.67	Male		July	29
August	27.04	17.45	Male		August	27.2
August	25.78	16.6	Male		September	27.5
August	15.2	10.44	Male		October	29.4
August	21.28	14.35	Male		November	26.7
August	15.35	10.35	Male		December	22.1
August	14.25	9.8	Male
August	11.66	12.15	Male
August	12.88	9.08	Male
August	27.29	17.36	Male
August	7.73	8.37	Male
August	11.99	8.21	Male
August	13.94	9.73	Male
August	13.94	9.74	Male
August	11.94	8.35	Male
August	10.92	7.72	Male
August	17.96	12.11	Male
August	13.14	9.03	Male
August	16.9	11.6	Male
August	19.14	13.01	Male
August	9.96	7.27	Male
August	9.88	7.14	Male
August	21.32	14.75	Male
August	18.32	12.51	Male
August	21.73	14.38	Male
August	20.94	14.29	Male
August	21.51	16.44	Male
August	18.36	14.64	Male
August	23.54	16.64	Male
August	10.94	7.85	Male
August	9.69	6.73	Male
August	12.45	8.49	Male
August	7.43	5.37	Male
August	9.06	6.37	Male
August	10.02	7.03	Male
August	18.06	12.04	Male
August	19.15	13.17	Male
August	11.76	8.32	Male
September	22.74	15.3	Male
September	19.89	13.82	Male
September	21.02	14.12	Male
September	22.24	14.63	Male
September	16.73	11.11	Male
September	19.44	13.32	Male
September	21.92	14.88	Male
September	25.1	16.46	Male
September	25.62	16.74	Male
September	22.77	15.01	Male
September	15.57	10.99	Male
September	19.24	12.57	Male
September	21.75	14.49	Male
September	17.34	11.94	Male
September	17.01	11.4	Male
September	16.82	11.55	Male
September	21.69	14.53	Male
September	18.82	13.23	Male
September	19.02	12.83	Male
September	16.14	10.79	Male
September	16.92	11.7	Male
September	20.15	13.46	Male
September	14.14	9.91	Male
September	17.27	11.64	Male
September	19.99	13.56	Male
September	14.34	9.48	Male
September	18.9	13.14	Male
September	12.82	8.67	Male
September	12.56	8.84	Male
September	11.3	7.94	Male
September	11.66	8.47	Male
September	14.7	10.34	Male
September	9.65	6.81	Male
September	9.43	7.97	Male
September	14.87	9.51	Male
September	13.42	9.5	Male
September	14.76	10.29	Male
September	12.06	8.37	Male
September	17.11	11.7	Male
September	12.11	8.16	Male
September	11.42	7.94	Male
September	10.03	7.12	Male
September	8.49	5.79	Male
September	13.21	8.79	Male
September	11.23	7.8	Male
September	13.22	9.44	Male
September	6.23	4.88	Male
September	10.33	7.12	Male
September	11.33	7.91	Male
September	11.18	7.78	Male
September	8.43	6.01	Male
September	9.81	6.94	Male
September	7.2	5.4	Male
September	6.23	4.93	Male
October	24.92	16.12	Male
October	24.64	16.28	Male
October	24.31	16.19	Male
October	19.71	13.4	Male
October	20.18	13.48	Male
October	21.95	13.76	Male
October	20.32	13.52	Male
October	16.78	11.52	Male
October	17.76	11.87	Male
October	16.16	11.23	Male
October	17.34	11.27	Male
October	18.48	12.17	Male
October	18.46	12.64	Male
October	17.15	11.79	Male
October	16.07	11.11	Male
October	16.97	11.65	Male
October	16.42	11.55	Male
October	14.69	10.05	Male
October	14.32	9.83	Male
October	14.12	9.81	Male
October	15.12	10.56	Male
October	13.48	8.95	Male
October	16.12	10.87	Male
October	14.21	9.84	Male
October	13.18	9.05	Male
October	14.8	10.27	Male
October	12.98	8.98	Male
October	10.04	6.74	Male
October	12.38	8.5	Male
October	12.16	8.19	Male
October	11.21	7.56	Male
October	12	8.02	Male
October	11.61	8.45	Male
October	10.95	7.65	Male
October	8.43	5.56	Male
October	9.03	6.13	Male
October	9.52	6.39	Male
October	11.38	7.69	Male
October	13.68	8.6	Male
October	10.75	6.85	Male
October	8.45	5.8	Male
October	11.55	8.12	Male
October	9.06	6.14	Male
October	7.92	5.36	Male
October	6.46	4.39	Male
November	8.82	6.01	Male
November	10.48	7.49	Male
November	8.92	6.22	Male
November	12.37	8.84	Male
November	12.43	8.61	Male
November	11.4	7.43	Male
November	11.4	7.43	Male
November	20.14	13.2	Male
November	11.08	7.07	Male
November	17.93	12.28	Male
November	27.05	17.38	Male
November	17.55	11.42	Male
November	15.98	10.95	Male
November	14.67	10.13	Male
November	11.07	1.57	Male
November	10.21	7.27	Male
November	21.01	14.2	Male
November	10.32	6.94	Male
November	11.37	7.43	Male
November	19.05	13.13	Male
November	26.69	17.63	Male
November	21.67	14.27	Male
November	22.49	16.07	Male
November	21.64	14.35	Male
November	16.28	11.17	Male
November	21.02	14.26	Male
November	15.05	10.13	Male
November	23.3	15.02	Male
November	18.58	12.47	Male
November	17.19	11.69	Male
November	13.35	9.4	Male
November	11.51	7.61	Male
November	8.49	5.87	Male
November	10.19	6.85	Male
November	14.56	9.89	Male
November	10.57	6.77	Male
November	7.67	5.6	Male
November	13.94	9.67	Male
November	14.03	9.81	Male
November	10.29	6.83	Male
November	10.43	7.23	Male
November	13.91	9.78	Male
November	13.07	8.9	Male
November	14.63	9.93	Male
December	27.29	17.88	Male
December	29	19.77	Male
December	10.13	6.87	Male
December	24.92	16.11	Male
December	25.08	16.03	Male
December	20.85	13.92	Male
December	22.93	15.2	Male
December	15.02	10.27	Male
December	19.11	13.87	Male
December	21.29	14.61	Male
December	22.03	14.52	Male
December	22.66	15.33	Male
December	12.9	8.97	Male
December	11.2	7.91	Male
December	12.16	8.35	Male
December	20.51	14.33	Male
December	16.68	11.6	Male
December	22.49	14.9	Male
December	13.75	9.79	Male
December	17.02	11.37	Male
December	15.24	10.33	Male
December	19.36	12.91	Male
December	22.54	14.57	Male
December	15.55	10.44	Male
December	25.33	16.47	Male
December	9.9	7.05	Male
December	20.11	13.61	Male
December	11.36	7.89	Male
December	22.6	14.6	Male
December	13.09	9.42	Male
December	12.82	8.69	Male
December	11.22	7.72	Male
December	16.18	10.75	Male
December	11.97	8.37	Male
December	12.96	9	Male
December	10.03	6.97	Male
December	12.77	8.69	Male
December	16.78	11.55	Male
December	9.68	6.47	Male
December	13.28	8.88	Male
December	16.22	11.09	Male
December	13.79	9.8	Male
December	7.54	4.68	Male
December	11.18	7.56	Male
December	11.38	7.54	Male
December	8.78	6.05	Male
December	13.45	9.24	Male
December	14.6	9.92	Male
January	22.94	15.39	Male
January	27.82	17.43	Male
January	19.92	13.04	Male
January	22.44	16.65	Male
January	21.98	14.69	Male
January	24.71	15.92	Male
January	26.86	17.46	Male
January	23.82	15.05	Male
January	16.15	11.2	Male
January	15.88	11.31	Male
January	22.85	16.12	Male
January	17.22	11.83	Male
January	6.76	5.33	Male
January	5.5	4.1	Male
January	8.71	6.59	Male
January	10.09	7	Male
January	23.04	15.33	Male
January	13.85	9.65	Male
January	10.02	7	Male
January	13.77	9.4	Male
January	12.61	8.85	Male
January	23.34	15.46	Male
January	13.01	8.98	Male
January	12.27	8.77	Male
January	21.51	14.65	Male
January	9.52	6.94	Male
January	17.31	11.86	Male
January	19.66	12.99	Male
January	12.9	8.97	Male
January	9.82	6.74	Male
January	7.94	5.86	Male
January	26.76	17.36	Male
January	12.79	8.87	Male
January	8.38	6.11	Male
January	11.35	6.31	Male
January	17.28	11.79	Male
January	14.43	10.26	Male
January	11.4	11.91	Male
January	14.2	9.73	Male
January	10.72	7.49	Male
January	10.85	8.03	Male
January	10.37	7.07	Male
January	9.46	6.56	Male
January	6.84	5.06	Male
January	11.28	7.87	Male
January	8.77	5.98	Male
January	14.68	9.97	Male
January	15.9	10.33	Male
January	7.96	5.68	Male
January	16.81	11.27	Male
January	13.47	9.54	Male
February	26.93	17.36	Male
February	25.83	16.82	Male
February	21.53	14.1	Male
February	22.13	14.9	Male
February	22.88	15.03	Male
February	18.49	12.58	Male
February	25.24	16.64	Male
February	17.48	12.22	Male
February	22.56	15.37	Male
February	18.19	12.54	Male
February	24.97	16.47	Male
February	16.69	11.23	Male
February	17.92	12.31	Male
February	22.36	15.04	Male
February	15.53	10.94	Male
February	18.5	12.82	Male
February	16.91	11.55	Male
February	11.93	8.58	Male
February	16.26	11.58	Male
February	13.99	10	Male
February	16.54	11.77	Male
February	14.33	10.39	Male
February	15.87	10.93	Male
February	17.72	11.61	Male
February	14.53	10.01	Male
February	14.41	9.85	Male
February	14.94	10	Male
February	13.83	9.76	Male
February	13.08	9.8	Male
February	11.37	7.86	Male
February	9.85	6.8	Male
February	11.88	8.11	Male
February	10.69	7.61	Male
February	12.46	8.73	Male
February	15.42	10.69	Male
February	13.06	8.8	Male
February	12.84	8.73	Male
February	12.75	8.73	Male
February	10.24	7.38	Male
February	11.93	8.44	Male
February	8.72	6.12	Male
February	11.59	8.34	Male
February	12.51	9.39	Male
February	9.18	7.67	Male
February	10.66	7.15	Male
February	9.9	7.03	Male
February	13.25	9.44	Male
February	17.02	11.31	Male
February	11.27	7.8	Male
February	12.97	8.76	Male
February	10.29	7.5	Male
February	7.87	5.69	Male
February	7.52	5.36	Male
February	8.16	5.82	Male
February	7.19	5.47	Male
February	5.15	3.54	Male
March	14.99	10.03	Male
March	12.14	8.69	Male
March	11.43	6.92	Male
March	20.33	13.37	Male
March	21.66	14.68	Male
March	10.35	7.08	Male
March	13.01	9.1	Male
March	25.19	16.15	Male
March	21.32	14.28	Male
March	18.51	12.47	Male
March	18.21	12.28	Male
March	19.58	13.3	Male
March	19.57	13.38	Male
March	23.19	15.57	Male
March	26.71	17.67	Male
March	18.06	12.61	Male
March	25.26	16.76	Male
March	9.02	6.22	Male
March	10.85	7.67	Male
March	23.57	15.88	Male
March	15.08	10.01	Male
March	18.09	12.13	Male
March	14.9	10.13	Male
March	18.71	12.55	Male
March	13.12	19.64	Male
March	12.73	8.67	Male
March	16.21	11.11	Male
March	19.19	12.69	Male
March	9.19	6.8	Male
March	20.36	13.26	Male
March	10.66	7.36	Male
March	16.96	11.72	Male
March	16.28	11.5	Male
March	10.43	7.44	Male
March	8.4	6.03	Male
March	13.84	9.8	Male
March	17.52	12.12	Male
March	10.41	7.31	Male
March	10.47	7.96	Male
March	14.25	9.78	Male
March	12.19	8.35	Male
March	14.23	9.65	Male
March	16.59	11.31	Male
March	9.46	6.46	Male
March	22	14.62	Male
March	9.21	6.43	Male
March	11.66	8.1	Male
March	8.48	6.07	Male
March	12.55	8.43	Male
March	9.29	6.68	Male
March	12.03	8.32	Male
March	15.49	10.71	Male
March	9.32	6.34	Male
March	12.52	8.85	Male
March	8.12	5.75	Male
April	26.71	17.51	Male
April	27.85	17.99	Male
April	27.04	17.83	Male
April	25.33	17.13	Male
April	26.75	17.42	Male
April	23.38	15	Male
April	28.87	18.4	Male
April	27.86	17.7	Male
April	25.45	16.77	Male
April	24.8	16.17	Male
April	24.88	16.4	Male
April	20.67	14.37	Male
April	24.86	16.4	Male
April	22.95	14.16	Male
April	22.56	14.87	Male
April	19.41	13.1	Male
April	18.61	12.52	Male
April	21.7	14.76	Male
April	19.75	13.08	Male
April	19.05	12.7	Male
April	21.06	14.32	Male
April	16.42	11.36	Male
April	17.87	12.19	Male
April	16.27	11.01	Male
April	15.52	10.66	Male
April	11.26	7.87	Male
April	16.5	11.32	Male
April	17.32	11.91	Male
April	12.04	8.14	Male
April	16.35	11.53	Male
April	12.64	8.95	Male
April	12.79	8.74	Male
April	12.61	8.71	Male
April	14.55	10	Male
April	11.42	7.16	Male
April	10.27	7.46	Male
April	12.64	8.83	Male
April	18.2	10.56	Male
April	13.24	9.24	Male
April	12.89	8.46	Male
April	14.85	10.59	Male
April	10.22	7.07	Male
April	11.21	7.63	Male
April	12.98	8.69	Male
April	9.8	6.76	Male
April	11.42	8.15	Male
April	12.91	8.63	Male
April	12.61	8.72	Male
April	8.43	6.14	Male
April	10.6	7.41	Male
April	13.29	9.42	Male
April	10.04	7.41	Male
April	7.94	5.64	Male
April	7.55	5.7	Male
April	11.1	7	Male
May	19.8	12.8	Male
May	18.33	12.52	Male
May	20.4	13.84	Male
May	20.21	13.12	Male
May	19.01	12.32	Male
May	14.69	10.64	Male
May	16.95	11.48	Male
May	14	9.29	Male
May	27.57	17.54	Male
May	18.08	13.62	Male
May	22.12	15.88	Male
May	21.76	15.09	Male
May	17.33	11.87	Male
May	14.91	10.63	Male
May	14.52	10.38	Male
May	16.37	11	Male
May	14.25	10.1	Male
May	20.96	14.47	Male
May	26.28	17.28	Male
May	21.98	15.31	Male
May	19.59	13.28	Male
May	29.98	18.27	Male
May	28.56	18.9	Male
May	17.26	11.91	Male
May	11.03	8.4	Male
May	27.02	17.39	Male
May	13.45	9.59	Male
May	19.28	13.28	Male
May	19.84	13.84	Male
May	21.58	14.22	Male
May	13.01	9.18	Male
May	16.14	10.16	Male
May	16.41	10.57	Male
May	17.97	12.13	Male
May	15.14	10.41	Male
May	21.54	14.77	Male
May	14.25	9.93	Male
May	17.49	11.95	Male
May	15.19	16.94	Male
May	17.29	11.23	Male
May	22.25	15.29	Male
May	18.47	12.02	Male
May	18.99	13	Male
May	19.13	13.01	Male
May	20.24	14.65	Male
May	13.23	7.99	Male
May	12.74	9.3	Male
May	23.68	15.47	Male
May	17.64	12.52	Male
May	18.08	12.31	Male
May	14.64	9.67	Male
May	12.47	7.11	Male
May	21.06	14.2	Male
May	16.92	11.24	Male
May	19.58	12.24	Male
May	14.78	10.34	Male
May	15.57	10.61	Male
May	19.33	12.67	Male
May	15.28	9.94	Male
May	19.94	13.52	Male
May	19.1	13	Male
May	11.67	8.4	Male
May	14.42	9.81	Male
May	12.23	8.34	Male
May	10.92	7.47	Male
May	15.13	10.49	Male
May	13.8	8.3	Male
May	16.4	11.24	Male
May	9.97	6.98	Male
June	27.01	17.26	Male
June	24.8	16.21	Male
June	26.34	17.61	Male
June	20.19	13.5	Male
June	22.67	15.37	Male
June	21.83	14.45	Male
June	22.49	15.1	Male
June	23.37	14.65	Male
June	14.94	10.22	Male
June	16.81	11.27	Male
June	21.77	14.63	Male
June	25.44	16.93	Male
June	19.49	13.05	Male
June	23.62	14.95	Male
June	12.28	8.7	Male
June	15.48	10.53	Male
June	20.37	13.32	Male
June	14.64	9.77	Male
June	13.78	9.19	Male
June	9.02	6.18	Male
July	23.98	15.99	Male
July	16.57	11.53	Male
July	12.54	11.93	Male
July	27.32	17.51	Male
July	13.16	9.11	Male
July	13.31	9.31	Male
July	17.29	11.63	Male
July	15.08	10.63	Male
July	19.59	13.44	Male
July	20.58	13.62	Male
July	12.72	8.71	Male
July	16.41	11.71	Male
July	12.98	8.75	Male
July	18.95	12.82	Male
July	10.12	6.78	Male
July	15.54	10.8	Male
July	12.48	8.11	Male
August	20.13	13.36	Non-Ovigerous Female
August	18.35	12.13	Non-Ovigerous Female
August	6.7	11.53	Non-Ovigerous Female
August	16.33	11.36	Non-Ovigerous Female
August	14.98	10.15	Non-Ovigerous Female
August	5.26	12.05	Non-Ovigerous Female
August	12.15	8.47	Non-Ovigerous Female
August	15.1	10.54	Non-Ovigerous Female
August	13.05	8.9	Non-Ovigerous Female
August	18.17	11.99	Non-Ovigerous Female
August	12.6	8.7	Non-Ovigerous Female
August	19.13	12.65	Non-Ovigerous Female
August	13.57	9.42	Non-Ovigerous Female
August	13.8	9.31	Non-Ovigerous Female
August	10.34	7.19	Non-Ovigerous Female
August	11.26	7.81	Non-Ovigerous Female
August	16.7	11.39	Non-Ovigerous Female
August	18.36	12.6	Non-Ovigerous Female
August	15.35	10.64	Non-Ovigerous Female
August	16.4	11.15	Non-Ovigerous Female
August	28.63	18.51	Non-Ovigerous Female
August	18.08	12.39	Non-Ovigerous Female
August	16.96	11.47	Non-Ovigerous Female
August	19.24	12.79	Non-Ovigerous Female
August	16.55	11.34	Non-Ovigerous Female
August	11.4	8.11	Non-Ovigerous Female
August	12.16	8.5	Non-Ovigerous Female
August	9.47	6.75	Non-Ovigerous Female
August	16.63	11.47	Non-Ovigerous Female
August	16.79	11.39	Non-Ovigerous Female
August	15.86	11.88	Non-Ovigerous Female
August	17.77	12.17	Non-Ovigerous Female
August	10.82	8.53	Non-Ovigerous Female
August	10.39	7.72	Non-Ovigerous Female
August	12.08	8.42	Non-Ovigerous Female
August	17.87	11.83	Non-Ovigerous Female
August	19.27	12.98	Non-Ovigerous Female
August	22.83	15.21	Non-Ovigerous Female
August	19.83	13.24	Non-Ovigerous Female
August	16.7	11.19	Non-Ovigerous Female
August	12.58	8.76	Non-Ovigerous Female
August	14.41	9.66	Non-Ovigerous Female
August	11.73	8.23	Non-Ovigerous Female
August	16.64	11.23	Non-Ovigerous Female
August	10.48	7.25	Non-Ovigerous Female
August	12.67	8.79	Non-Ovigerous Female
August	17.35	11.71	Non-Ovigerous Female
August	14.25	9.54	Non-Ovigerous Female
August	10.66	7.49	Non-Ovigerous Female
August	11.27	7.78	Non-Ovigerous Female
September	14.8	10.09	Non-Ovigerous Female
September	18.06	11.85	Non-Ovigerous Female
September	18	11.99	Non-Ovigerous Female
September	17.37	10.59	Non-Ovigerous Female
September	18.82	12.47	Non-Ovigerous Female
September	13.01	9.06	Non-Ovigerous Female
September	15.22	10.27	Non-Ovigerous Female
September	20.11	13.73	Non-Ovigerous Female
September	18.46	12.62	Non-Ovigerous Female
September	14.44	10.43	Non-Ovigerous Female
September	18.06	11.92	Non-Ovigerous Female
September	11.43	9.78	Non-Ovigerous Female
September	11.65	8.23	Non-Ovigerous Female
September	13.37	9.21	Non-Ovigerous Female
September	17.83	11.77	Non-Ovigerous Female
September	13.54	9.25	Non-Ovigerous Female
September	13.65	9.3	Non-Ovigerous Female
September	9.81	6.89	Non-Ovigerous Female
September	12.64	8.72	Non-Ovigerous Female
September	12.26	8.47	Non-Ovigerous Female
September	13.35	9.26	Non-Ovigerous Female
September	12.74	8.66	Non-Ovigerous Female
September	11.72	8.09	Non-Ovigerous Female
September	13.34	9.3	Non-Ovigerous Female
September	9.84	8.41	Non-Ovigerous Female
September	11.88	8.45	Non-Ovigerous Female
September	12.2	8.33	Non-Ovigerous Female
September	11.39	8.07	Non-Ovigerous Female
September	12.88	8.29	Non-Ovigerous Female
September	10.61	7.48	Non-Ovigerous Female
September	9.57	6.54	Non-Ovigerous Female
September	12.26	8.62	Non-Ovigerous Female
September	11.43	7.89	Non-Ovigerous Female
September	10.95	7.52	Non-Ovigerous Female
September	10.4	7.19	Non-Ovigerous Female
September	10.43	7.17	Non-Ovigerous Female
September	11.15	7.25	Non-Ovigerous Female
October	19.69	13.06	Non-Ovigerous Female
October	18.41	12.58	Non-Ovigerous Female
October	15.32	10.82	Non-Ovigerous Female
October	18.15	11.77	Non-Ovigerous Female
October	18.34	12.24	Non-Ovigerous Female
October	13.08	8.99	Non-Ovigerous Female
October	13.6	9.2	Non-Ovigerous Female
October	15.89	10.81	Non-Ovigerous Female
October	13.19	9.28	Non-Ovigerous Female
October	16.43	11.3	Non-Ovigerous Female
October	13.18	9.32	Non-Ovigerous Female
October	13.09	8.85	Non-Ovigerous Female
October	12.15	8.21	Non-Ovigerous Female
October	12.81	8.91	Non-Ovigerous Female
October	12.28	8.51	Non-Ovigerous Female
October	11.95	8.47	Non-Ovigerous Female
October	12.26	8.39	Non-Ovigerous Female
October	14.93	9.93	Non-Ovigerous Female
October	12.88	9.05	Non-Ovigerous Female
October	10.94	7.17	Non-Ovigerous Female
October	11.4	7.18	Non-Ovigerous Female
October	10.95	7.37	Non-Ovigerous Female
October	10.07	6.46	Non-Ovigerous Female
October	9.92	6.65	Non-Ovigerous Female
October	14.58	10.13	Non-Ovigerous Female
October	15.06	10.4	Non-Ovigerous Female
October	9.97	6.8	Non-Ovigerous Female
October	8.59	5.89	Non-Ovigerous Female
October	12.53	8.62	Non-Ovigerous Female
October	10.06	6.84	Non-Ovigerous Female
October	7.86	5.21	Non-Ovigerous Female
October	7.11	5.03	Non-Ovigerous Female
October	10.71	7.44	Non-Ovigerous Female
October	10.56	7.25	Non-Ovigerous Female
November	9.41	6.05	Non-Ovigerous Female
November	11.22	8.35	Non-Ovigerous Female
November	8.26	5.53	Non-Ovigerous Female
November	8.93	6.23	Non-Ovigerous Female
November	11.09	7.35	Non-Ovigerous Female
November	8.57	5.84	Non-Ovigerous Female
November	15.27	10.97	Non-Ovigerous Female
November	18.17	12.28	Non-Ovigerous Female
November	20.8	13.79	Non-Ovigerous Female
November	16.17	10.7	Non-Ovigerous Female
November	27.61	18.62	Non-Ovigerous Female
November	21.62	14.42	Non-Ovigerous Female
November	16.75	11.45	Non-Ovigerous Female
November	11.34	7.94	Non-Ovigerous Female
November	15.87	11.11	Non-Ovigerous Female
November	9.89	6.65	Non-Ovigerous Female
November	9.01	6.4	Non-Ovigerous Female
November	14.93	9.88	Non-Ovigerous Female
November	9.93	6.94	Non-Ovigerous Female
November	14.48	9.92	Non-Ovigerous Female
November	17.62	11.75	Non-Ovigerous Female
November	12.55	8.95	Non-Ovigerous Female
December	16.55	11.3	Non-Ovigerous Female
December	18.14	12.61	Non-Ovigerous Female
December	26.33	17.61	Non-Ovigerous Female
December	13.88	9.46	Non-Ovigerous Female
December	28.1	18.65	Non-Ovigerous Female
December	27.61	18.82	Non-Ovigerous Female
December	15.07	10.09	Non-Ovigerous Female
December	15.5	10.04	Non-Ovigerous Female
December	16.11	10.78	Non-Ovigerous Female
December	13.07	8.98	Non-Ovigerous Female
December	18.86	12.84	Non-Ovigerous Female
December	13.72	9.73	Non-Ovigerous Female
December	13.74	9.42	Non-Ovigerous Female
December	15.08	10.31	Non-Ovigerous Female
December	15.64	9.98	Non-Ovigerous Female
December	13.41	9.26	Non-Ovigerous Female
December	17.79	11.8	Non-Ovigerous Female
December	12.86	8.93	Non-Ovigerous Female
December	14.93	10.2	Non-Ovigerous Female
December	8.06	5.35	Non-Ovigerous Female
December	7.86	5.24	Non-Ovigerous Female
December	8.65	5.81	Non-Ovigerous Female
December	10.76	7.67	Non-Ovigerous Female
December	13.41	9.27	Non-Ovigerous Female
December	9.53	6.43	Non-Ovigerous Female
December	12.8	9.06	Non-Ovigerous Female
December	8.96	6.51	Non-Ovigerous Female
December	11.13	7.9	Non-Ovigerous Female
December	5.69	3.81	Non-Ovigerous Female
December	10.57	7.29	Non-Ovigerous Female
December	11.25	7.16	Non-Ovigerous Female
December	10.38	6.92	Non-Ovigerous Female
January	25.49	17.1	Non-Ovigerous Female
January	14.79	10.25	Non-Ovigerous Female
January	19.79	14.51	Non-Ovigerous Female
January	17.03	11.16	Non-Ovigerous Female
January	21.46	15.84	Non-Ovigerous Female
January	15.85	11.47	Non-Ovigerous Female
January	12.49	8.78	Non-Ovigerous Female
January	25.37	15.1	Non-Ovigerous Female
January	16.47	11.15	Non-Ovigerous Female
January	16.47	11.25	Non-Ovigerous Female
January	17.06	11.41	Non-Ovigerous Female
January	15.57	10.61	Non-Ovigerous Female
January	16.16	10.76	Non-Ovigerous Female
January	17.76	11.85	Non-Ovigerous Female
January	14.67	10.36	Non-Ovigerous Female
January	18.86	13.04	Non-Ovigerous Female
January	13.86	9.71	Non-Ovigerous Female
January	12.8	8.73	Non-Ovigerous Female
January	12.8	9.08	Non-Ovigerous Female
January	13.51	9.42	Non-Ovigerous Female
January	14.38	10.15	Non-Ovigerous Female
January	12.76	9.27	Non-Ovigerous Female
January	11.53	8.08	Non-Ovigerous Female
January	15.24	10.58	Non-Ovigerous Female
January	11.44	8.13	Non-Ovigerous Female
January	9.19	6.62	Non-Ovigerous Female
January	15.27	10.46	Non-Ovigerous Female
January	11.04	7.4	Non-Ovigerous Female
February	18.96	12.85	Non-Ovigerous Female
February	17.58	11.68	Non-Ovigerous Female
February	18.38	12.37	Non-Ovigerous Female
February	17.37	11.41	Non-Ovigerous Female
February	14.72	10.02	Non-Ovigerous Female
February	18.72	12.33	Non-Ovigerous Female
February	10.24	9.89	Non-Ovigerous Female
February	13.31	9.23	Non-Ovigerous Female
February	14.76	10.44	Non-Ovigerous Female
February	12	8.68	Non-Ovigerous Female
February	12.81	8.94	Non-Ovigerous Female
February	10.21	7.18	Non-Ovigerous Female
February	15.28	10.81	Non-Ovigerous Female
February	15.21	10.58	Non-Ovigerous Female
February	10.64	7.33	Non-Ovigerous Female
February	14.31	9.58	Non-Ovigerous Female
February	16.03	10.92	Non-Ovigerous Female
February	11.65	8.51	Non-Ovigerous Female
February	13.26	9.31	Non-Ovigerous Female
February	16.39	11.48	Non-Ovigerous Female
February	15.37	10.79	Non-Ovigerous Female
February	11.69	8.36	Non-Ovigerous Female
February	12.85	8.71	Non-Ovigerous Female
February	12.56	9.08	Non-Ovigerous Female
February	11.16	7.89	Non-Ovigerous Female
February	9.07	6.4	Non-Ovigerous Female
February	13.14	9.21	Non-Ovigerous Female
February	15.57	10.42	Non-Ovigerous Female
February	11.78	8.32	Non-Ovigerous Female
February	13.77	9.4	Non-Ovigerous Female
February	12.67	8.98	Non-Ovigerous Female
February	11.51	7.88	Non-Ovigerous Female
February	13.13	9.87	Non-Ovigerous Female
February	9.83	7.1	Non-Ovigerous Female
February	7.64	5.35	Non-Ovigerous Female
February	18.24	12.27	Non-Ovigerous Female
February	9.05	6.35	Non-Ovigerous Female
February	12.75	8.88	Non-Ovigerous Female
February	8.5	6.44	Non-Ovigerous Female
February	8.57	6.31	Non-Ovigerous Female
March	19.48	12.59	Non-Ovigerous Female
March	14	9.71	Non-Ovigerous Female
March	17.47	10.17	Non-Ovigerous Female
March	14.9	9.79	Non-Ovigerous Female
March	15.51	10.85	Non-Ovigerous Female
March	9.41	6.64	Non-Ovigerous Female
March	13.63	9.67	Non-Ovigerous Female
March	14.56	10.01	Non-Ovigerous Female
March	19.09	12.86	Non-Ovigerous Female
March	15.32	10.41	Non-Ovigerous Female
March	11.69	8.25	Non-Ovigerous Female
March	15.95	11.11	Non-Ovigerous Female
March	10.1	6.86	Non-Ovigerous Female
March	18.16	12.14	Non-Ovigerous Female
March	11.72	8.05	Non-Ovigerous Female
March	14.41	9.86	Non-Ovigerous Female
March	8.81	6.97	Non-Ovigerous Female
March	11.11	7.54	Non-Ovigerous Female
March	14.08	11.22	Non-Ovigerous Female
March	15.45	10.63	Non-Ovigerous Female
March	15.65	11.05	Non-Ovigerous Female
March	13.52	9.19	Non-Ovigerous Female
March	15.23	10.23	Non-Ovigerous Female
March	14.88	10.3	Non-Ovigerous Female
March	6.75	4.7	Non-Ovigerous Female
March	11.06	4.8	Non-Ovigerous Female
March	9.41	6.4	Non-Ovigerous Female
March	12.17	8.68	Non-Ovigerous Female
March	6.3	4.22	Non-Ovigerous Female
March	16.36	11.27	Non-Ovigerous Female
March	13.01	9	Non-Ovigerous Female
March	17.71	11.63	Non-Ovigerous Female
March	12.01	8.49	Non-Ovigerous Female
March	12.78	9.08	Non-Ovigerous Female
March	9.72	6.86	Non-Ovigerous Female
March	14.25	10.1	Non-Ovigerous Female
March	9	5.97	Non-Ovigerous Female
March	9.71	7.07	Non-Ovigerous Female
March	9.84	7.04	Non-Ovigerous Female
March	7.95	5.81	Non-Ovigerous Female
March	10.06	6.74	Non-Ovigerous Female
March	11.35	8.05	Non-Ovigerous Female
April	15.82	10.51	Non-Ovigerous Female
April	13.68	9.12	Non-Ovigerous Female
April	16.72	11.51	Non-Ovigerous Female
April	12.33	8.49	Non-Ovigerous Female
April	16.93	11.32	Non-Ovigerous Female
April	14.4	10.13	Non-Ovigerous Female
April	15.91	10.85	Non-Ovigerous Female
April	12.36	8.53	Non-Ovigerous Female
April	15.92	10.53	Non-Ovigerous Female
April	17.04	11.22	Non-Ovigerous Female
April	17.76	11.68	Non-Ovigerous Female
April	22.33	15.29	Non-Ovigerous Female
April	9.43	6.5	Non-Ovigerous Female
April	20.01	12.62	Non-Ovigerous Female
April	15.12	10.72	Non-Ovigerous Female
April	16.31	11.18	Non-Ovigerous Female
April	16.25	11.03	Non-Ovigerous Female
April	15.88	11.5	Non-Ovigerous Female
April	17.95	12.18	Non-Ovigerous Female
April	16.15	11.34	Non-Ovigerous Female
April	8.85	6.2	Non-Ovigerous Female
April	9.07	6.48	Non-Ovigerous Female
April	15.05	9.82	Non-Ovigerous Female
April	11.37	8.25	Non-Ovigerous Female
April	13.22	9.39	Non-Ovigerous Female
April	14.68	10.33	Non-Ovigerous Female
April	12.91	8.86	Non-Ovigerous Female
April	11.03	9.9	Non-Ovigerous Female
April	14.99	10.14	Non-Ovigerous Female
April	10.36	7.25	Non-Ovigerous Female
April	16.5	11.08	Non-Ovigerous Female
April	13.93	9.62	Non-Ovigerous Female
April	13.85	9.48	Non-Ovigerous Female
April	16.81	11.68	Non-Ovigerous Female
April	13.43	11.58	Non-Ovigerous Female
April	12.29	8.21	Non-Ovigerous Female
April	23.77	15.22	Non-Ovigerous Female
April	16.35	11.4	Non-Ovigerous Female
April	17.37	11.7	Non-Ovigerous Female
April	18.11	12.06	Non-Ovigerous Female
April	17.92	12.35	Non-Ovigerous Female
April	10.33	7.62	Non-Ovigerous Female
April	10.93	8.11	Non-Ovigerous Female
April	13.43	9.54	Non-Ovigerous Female
April	14.92	9.75	Non-Ovigerous Female
April	13.45	9.25	Non-Ovigerous Female
April	8.05	5.74	Non-Ovigerous Female
April	10.78	7.65	Non-Ovigerous Female
April	12.6	8.97	Non-Ovigerous Female
April	15.5	10.37	Non-Ovigerous Female
April	12.7	8.96	Non-Ovigerous Female
May	21.36	14.61	Non-Ovigerous Female
May	16.8	11.28	Non-Ovigerous Female
May	15.94	11.02	Non-Ovigerous Female
May	19.49	12.54	Non-Ovigerous Female
May	19.64	12.32	Non-Ovigerous Female
May	15.56	10.86	Non-Ovigerous Female
May	19.56	12.89	Non-Ovigerous Female
May	15.98	10.99	Non-Ovigerous Female
May	14.5	9.97	Non-Ovigerous Female
May	20.85	13.79	Non-Ovigerous Female
May	16.55	11.18	Non-Ovigerous Female
May	20.64	13.31	Non-Ovigerous Female
May	20.74	13.34	Non-Ovigerous Female
May	20.39	13.47	Non-Ovigerous Female
May	15.68	10.79	Non-Ovigerous Female
May	15.63	10.87	Non-Ovigerous Female
May	18.11	11.98	Non-Ovigerous Female
May	16.08	11.21	Non-Ovigerous Female
May	13.62	9.42	Non-Ovigerous Female
May	15.52	11.01	Non-Ovigerous Female
May	13.06	9.67	Non-Ovigerous Female
May	13.25	9.27	Non-Ovigerous Female
May	13.57	9.11	Non-Ovigerous Female
May	17.98	12.66	Non-Ovigerous Female
May	13.85	9.31	Non-Ovigerous Female
May	13.92	9.04	Non-Ovigerous Female
May	11.93	7.63	Non-Ovigerous Female
May	13.78	9.53	Non-Ovigerous Female
May	15.59	10.14	Non-Ovigerous Female
May	17.58	11.48	Non-Ovigerous Female
May	18.33	12.48	Non-Ovigerous Female
May	14.54	10.21	Non-Ovigerous Female
May	15.53	10.62	Non-Ovigerous Female
May	21.11	13.41	Non-Ovigerous Female
May	20.99	13.86	Non-Ovigerous Female
May	16	9.57	Non-Ovigerous Female
May	14.67	9.98	Non-Ovigerous Female
May	11.23	6.92	Non-Ovigerous Female
May	20.8	13.85	Non-Ovigerous Female
May	15.31	10.48	Non-Ovigerous Female
May	9.03	12.52	Non-Ovigerous Female
May	13.93	10.11	Non-Ovigerous Female
May	18.41	12	Non-Ovigerous Female
May	13.45	8.88	Non-Ovigerous Female
May	15.71	10.63	Non-Ovigerous Female
May	13.79	9.6	Non-Ovigerous Female
May	18.77	12.73	Non-Ovigerous Female
May	13.42	8.74	Non-Ovigerous Female
May	15.37	10.74	Non-Ovigerous Female
May	12.47	8.3	Non-Ovigerous Female
May	19.55	13.44	Non-Ovigerous Female
May	18.55	12.31	Non-Ovigerous Female
May	21.51	14.4	Non-Ovigerous Female
May	16.69	11.63	Non-Ovigerous Female
May	14.09	9.53	Non-Ovigerous Female
May	15.08	10.7	Non-Ovigerous Female
May	14.44	9.89	Non-Ovigerous Female
May	14.84	10.15	Non-Ovigerous Female
May	17.34	11.93	Non-Ovigerous Female
May	17.82	11.59	Non-Ovigerous Female
May	13.48	8.82	Non-Ovigerous Female
May	9.6	6.54	Non-Ovigerous Female
May	9.08	5.56	Non-Ovigerous Female
May	11.02	8.71	Non-Ovigerous Female
May	9.37	6.17	Non-Ovigerous Female
May	10.23	6.86	Non-Ovigerous Female
May	9.91	7.03	Non-Ovigerous Female
May	9.62	6.63	Non-Ovigerous Female
May	11.36	7.13	Non-Ovigerous Female
June	21.87	15.36	Non-Ovigerous Female
June	18.18	11.94	Non-Ovigerous Female
June	19.52	12.97	Non-Ovigerous Female
June	17.19	11.45	Non-Ovigerous Female
June	17.92	11.57	Non-Ovigerous Female
June	14.02	9.5	Non-Ovigerous Female
June	16.19	10.84	Non-Ovigerous Female
June	14.33	9.89	Non-Ovigerous Female
June	19.23	12.85	Non-Ovigerous Female
June	20.69	13.51	Non-Ovigerous Female
June	16.86	11.24	Non-Ovigerous Female
June	13.3	9.25	Non-Ovigerous Female
June	11.16	7.79	Non-Ovigerous Female
June	14.27	9.67	Non-Ovigerous Female
June	17.45	12.08	Non-Ovigerous Female
June	13.67	9.38	Non-Ovigerous Female
June	10.23	6.95	Non-Ovigerous Female
June	20.06	13.05	Non-Ovigerous Female
June	11	7.72	Non-Ovigerous Female
June	12.67	8.64	Non-Ovigerous Female
June	14.74	10.53	Non-Ovigerous Female
June	15.2	10.35	Non-Ovigerous Female
June	7.94	5.72	Non-Ovigerous Female
July	13.69	9.45	Non-Ovigerous Female
July	16.97	11.48	Non-Ovigerous Female
July	13.2	9.39	Non-Ovigerous Female
July	14.03	9.97	Non-Ovigerous Female
July	17.83	12.1	Non-Ovigerous Female
July	15.3	10.9	Non-Ovigerous Female
July	19.57	13.54	Non-Ovigerous Female
July	14.79	10.08	Non-Ovigerous Female
July	12.88	8.73	Non-Ovigerous Female
July	12.76	9.04	Non-Ovigerous Female
July	17.27	11.79	Non-Ovigerous Female
July	22.89	14.87	Non-Ovigerous Female
July	14.16	9.93	Non-Ovigerous Female
July	10.29	7.53	Non-Ovigerous Female
August	23.57	15.7	Ovigerous Female
August	19.76	13.27	Ovigerous Female
August	14.92	13.27	Ovigerous Female
August	16.37	11.14	Ovigerous Female
August	14.23	9.86	Ovigerous Female
August	16.83	11.13	Ovigerous Female
September	16.3	11.01	Ovigerous Female
September	22.75	14.71	Ovigerous Female
September	14.9	13.25	Ovigerous Female
September	15.34	10.13	Ovigerous Female
September	12.15	8.71	Ovigerous Female
October	18.81	12.22	Ovigerous Female
October	17.59	11.92	Ovigerous Female
October	19.02	12.4	Ovigerous Female
October	19.28	12.9	Ovigerous Female
October	21.26	14.14	Ovigerous Female
November	21.11	14.05	Ovigerous Female
November	23.55	15.88	Ovigerous Female
November	17.8	11.66	Ovigerous Female
November	19.8	13.25	Ovigerous Female
November	19.7	13	Ovigerous Female
November	18	12.18	Ovigerous Female
November	15.19	10.34	Ovigerous Female
November	15.55	11.15	Ovigerous Female
November	16	11.12	Ovigerous Female
November	16.03	10.7	Ovigerous Female
December	23.07	15.71	Ovigerous Female
December	22.75	16.14	Ovigerous Female
December	18.28	11.99	Ovigerous Female
December	23.28	15.11	Ovigerous Female
December	15.13	10.51	Ovigerous Female
December	18.13	12.29	Ovigerous Female
December	15.72	10.42	Ovigerous Female
December	18.68	13.06	Ovigerous Female
December	15.23	10.55	Ovigerous Female
December	12.3	8.75	Ovigerous Female
December	17.86	11.97	Ovigerous Female
December	18.39	12.02	Ovigerous Female
December	16.8	11.46	Ovigerous Female
December	15.84	10.6	Ovigerous Female
December	14.24	9.49	Ovigerous Female
December	19.45	13.48	Ovigerous Female
December	15.56	10.64	Ovigerous Female
December	14.63	9.98	Ovigerous Female
December	18.57	12.26	Ovigerous Female
December	14.52	9.77	Ovigerous Female
December	18.89	12.8	Ovigerous Female
December	19.34	13.57	Ovigerous Female
December	19.05	12.91	Ovigerous Female
January	14.75	10.44	Ovigerous Female
January	13.08	8.9	Ovigerous Female
January	23.85	15.84	Ovigerous Female
January	15.39	10.65	Ovigerous Female
January	18.92	12.51	Ovigerous Female
January	17.46	11.74	Ovigerous Female
January	21.65	14.61	Ovigerous Female
January	14.96	10.38	Ovigerous Female
January	19.77	12.72	Ovigerous Female
January	27.79	14.95	Ovigerous Female
January	20.75	13.71	Ovigerous Female
January	21.37	14.1	Ovigerous Female
January	19.72	13.56	Ovigerous Female
January	21.05	14.1	Ovigerous Female
January	20.08	13.2	Ovigerous Female
January	18.46	12.44	Ovigerous Female
January	18.26	12.03	Ovigerous Female
January	13.74	9.21	Ovigerous Female
January	20.46	13.45	Ovigerous Female
January	18.44	12.79	Ovigerous Female
January	20.38	13.56	Ovigerous Female
January	18.04	12.07	Ovigerous Female
January	18.58	12.51	Ovigerous Female
January	16.46	11.11	Ovigerous Female
February	24.02	15.18	Ovigerous Female
February	20.06	13.86	Ovigerous Female
February	18.23	12.15	Ovigerous Female
February	19.36	12.9	Ovigerous Female
February	16.94	13.9	Ovigerous Female
February	18.66	12.53	Ovigerous Female
February	20.11	13.22	Ovigerous Female
February	19.78	13.05	Ovigerous Female
February	18.13	12.54	Ovigerous Female
February	15.9	10.74	Ovigerous Female
February	18.84	12.47	Ovigerous Female
February	16.89	11.22	Ovigerous Female
February	16.51	11.28	Ovigerous Female
February	17.84	12.14	Ovigerous Female
February	18.6	12.5	Ovigerous Female
February	17.49	12.36	Ovigerous Female
February	21.02	14.66	Ovigerous Female
February	16.82	11.58	Ovigerous Female
February	15.16	10.55	Ovigerous Female
February	19.51	13.42	Ovigerous Female
February	17.5	11.62	Ovigerous Female
February	13.87	9.79	Ovigerous Female
February	16.29	11.01	Ovigerous Female
February	20.51	13.51	Ovigerous Female
February	16.19	11.36	Ovigerous Female
February	17.52	11.79	Ovigerous Female
February	16.12	11.36	Ovigerous Female
February	16.07	11.3	Ovigerous Female
February	16.72	11.33	Ovigerous Female
February	16.67	11.07	Ovigerous Female
February	17.24	11.69	Ovigerous Female
February	19.42	13.38	Ovigerous Female
February	15.02	10.15	Ovigerous Female
March	15.09	10.35	Ovigerous Female
March	17.05	11.15	Ovigerous Female
March	17.98	12.01	Ovigerous Female
March	19.37	12.62	Ovigerous Female
March	16.64	11.33	Ovigerous Female
March	17.26	11.72	Ovigerous Female
March	15.88	10.75	Ovigerous Female
March	18.04	12.14	Ovigerous Female
March	15.88	10.62	Ovigerous Female
March	17.77	11.95	Ovigerous Female
March	16.39	11.24	Ovigerous Female
March	18.32	12.62	Ovigerous Female
March	15.88	11.01	Ovigerous Female
March	17.05	11.88	Ovigerous Female
March	15.7	10.72	Ovigerous Female
March	19.51	13.38	Ovigerous Female
March	17.79	12.46	Ovigerous Female
March	17.26	11.85	Ovigerous Female
March	15.08	10.61	Ovigerous Female
March	14.9	10.11	Ovigerous Female
March	18.31	12.23	Ovigerous Female
March	17.61	14.56	Ovigerous Female
March	19.01	12.91	Ovigerous Female
March	14.15	10.12	Ovigerous Female
March	18.01	13.31	Ovigerous Female
March	18.72	13.01	Ovigerous Female
March	14.43	12.01	Ovigerous Female
March	14.12	10.79	Ovigerous Female
April	20.7	13.45	Ovigerous Female
April	20.33	13.06	Ovigerous Female
April	17.74	12.47	Ovigerous Female
April	17.49	11.69	Ovigerous Female
April	19.74	13.44	Ovigerous Female
April	18.29	12.54	Ovigerous Female
April	18.23	12.19	Ovigerous Female
April	17.04	11.48	Ovigerous Female
April	18.33	12.34	Ovigerous Female
April	19.78	13.74	Ovigerous Female
April	18.5	12.42	Ovigerous Female
April	15.28	10.37	Ovigerous Female
April	18.36	12.35	Ovigerous Female
April	16.85	11.41	Ovigerous Female
April	17.61	11.66	Ovigerous Female
April	18.02	11.94	Ovigerous Female
April	16	10.15	Ovigerous Female
April	17.79	12.18	Ovigerous Female
April	17.95	11.89	Ovigerous Female
April	16.55	11.33	Ovigerous Female
April	17.9	12.3	Ovigerous Female
April	14.71	10.09	Ovigerous Female
April	13.74	9.42	Ovigerous Female
April	17.77	11.94	Ovigerous Female
April	15.33	10.45	Ovigerous Female
April	14.66	10.62	Ovigerous Female
April	17.91	12.01	Ovigerous Female
April	18.98	12.84	Ovigerous Female
April	16.8	11.47	Ovigerous Female
April	17.18	12.04	Ovigerous Female
April	20.65	13.76	Ovigerous Female
April	18.89	12.94	Ovigerous Female
April	15.96	10.69	Ovigerous Female
April	19.47	13.09	Ovigerous Female
April	16.1	11.03	Ovigerous Female
April	16.26	11.02	Ovigerous Female
April	21.87	14.59	Ovigerous Female
April	18.29	12.12	Ovigerous Female
April	20.67	14.1	Ovigerous Female
April	18.37	12.29	Ovigerous Female
April	16.36	10.91	Ovigerous Female
May	13.72	10.93	Ovigerous Female
May	18.34	12.59	Ovigerous Female
May	21.36	13.4	Ovigerous Female
May	14.48	10.51	Ovigerous Female
May	15.8	10.9	Ovigerous Female
May	17.28	11.05	Ovigerous Female
May	13.5	8.92	Ovigerous Female
May	21.03	14.16	Ovigerous Female
May	13.39	10.12	Ovigerous Female
May	20.93	13.26	Ovigerous Female
May	16.08	11.23	Ovigerous Female
May	18.19	11.89	Ovigerous Female
May	16	9.55	Ovigerous Female
May	14.45	10.03	Ovigerous Female
May	17.82	12.39	Ovigerous Female
May	21.33	13.48	Ovigerous Female
May	18.99	12.86	Ovigerous Female
May	19.6	13.29	Ovigerous Female
May	14	9.28	Ovigerous Female
May	26.96	16.48	Ovigerous Female
May	21.45	15.29	Ovigerous Female
May	16.41	10.09	Ovigerous Female
May	17.97	12.21	Ovigerous Female
May	14.51	9.13	Ovigerous Female
May	20.2	13.61	Ovigerous Female
May	22.12	15.51	Ovigerous Female
May	14.27	10.36	Ovigerous Female
May	17.98	12.65	Ovigerous Female
May	15.32	10.49	Ovigerous Female
May	18.77	12.72	Ovigerous Female
May	19.55	13.45	Ovigerous Female
June	20.71	13.7	Ovigerous Female
June	19.27	12.86	Ovigerous Female
June	17.86	12.14	Ovigerous Female
July	16.18	11.06	Ovigerous Female
July	14.1	9.85	Ovigerous Female
July	12.97	9.41	Ovigerous Female
July	15.03	10.1	Ovigerous Female
July	13.24	9.15	Ovigerous Female
July	21.08	13.76	Ovigerous Female
